# Supplementary material for: Porphyrinic MOFs for reversible fluorescent and colorimetric sensing of mercury(ii) ions in aqueous phase
Source: Royal Society of Chemistry journal article supplement (doi:10.1039/c6ra13766k), 2016-01-01
Supplement: c6ra13766k1.pdf [file c6ra13766k1.pdf]

# Supporting Information

## Porphyritic MOFs for reversible fluorescent and colorimetric sensing of mercury (II) ions in aqueous-phase

Jian Yang, Zhe Wang, Yongsheng Li, Qixin Zhuang, Wenru Zhao and Jinlou Gu\*

Key Laboratory for Ultrafine Materials of Ministry of Education, School of Materials  
Science and Engineering, East China University of Science and Technology, Shanghai  
200237, China

Fax: +86-21-64250740; Tel: +86-21-64252599

E-mails: [jinlougu@ecust.edu.cn](mailto:jinlougu@ecust.edu.cn)

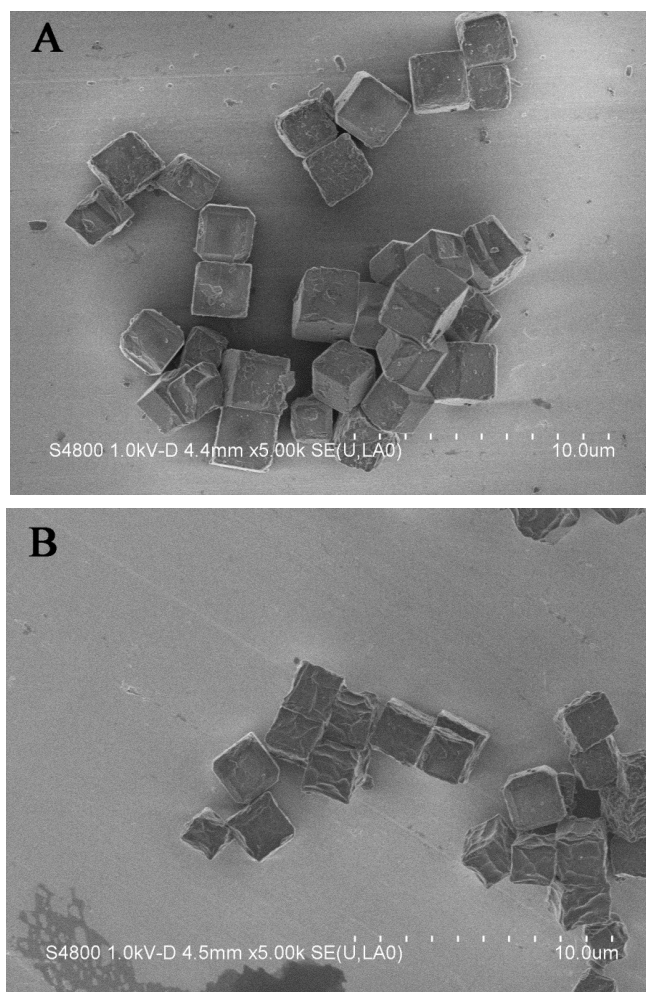

**Fig. S1** Scanning electron microscopy (SEM) images of (A) the as-synthesized PCN-224 and (B) PCN-224-KI particles regenerated by KI solution.

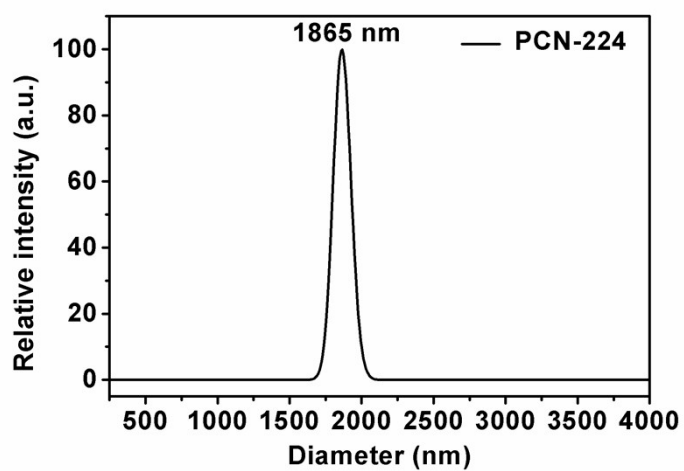

**Fig. S2** Typical DLS profile of PCN-224 particles measured in aqueous solution.

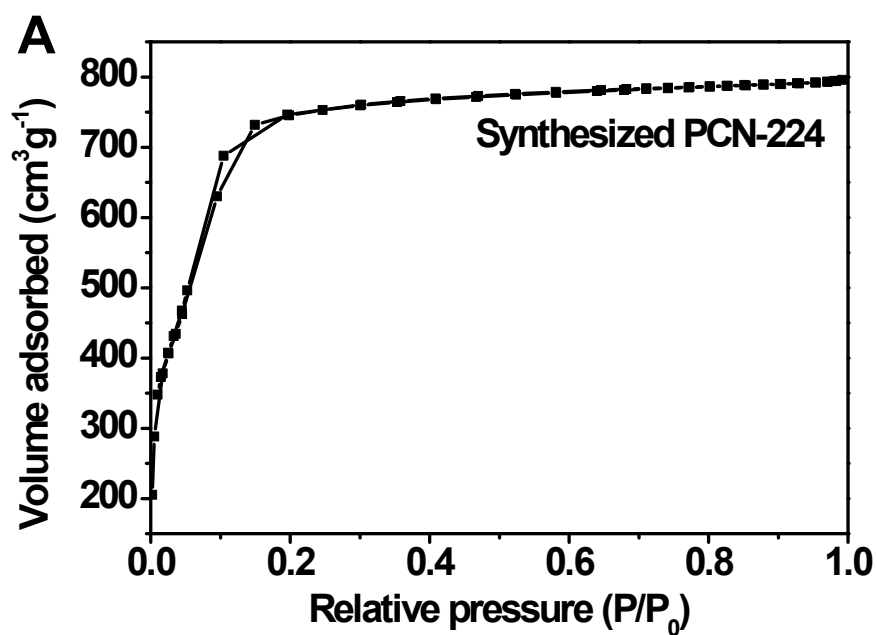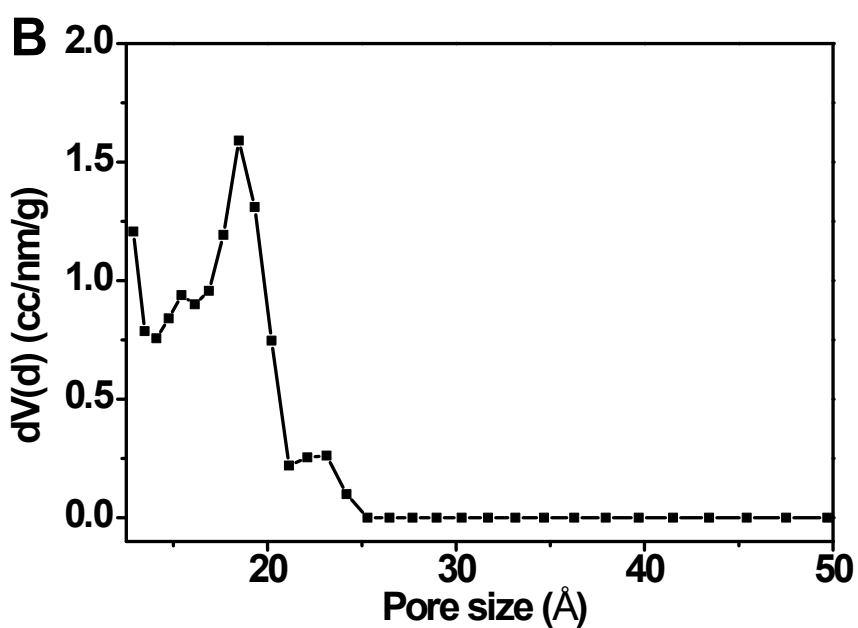

**Fig. S3** (A)  $\text{N}_2$  sorption isotherm at 77 K for the as-synthesized PCN-224 particles and (B) is the corresponding pore size distribution calculated by the DFT method.

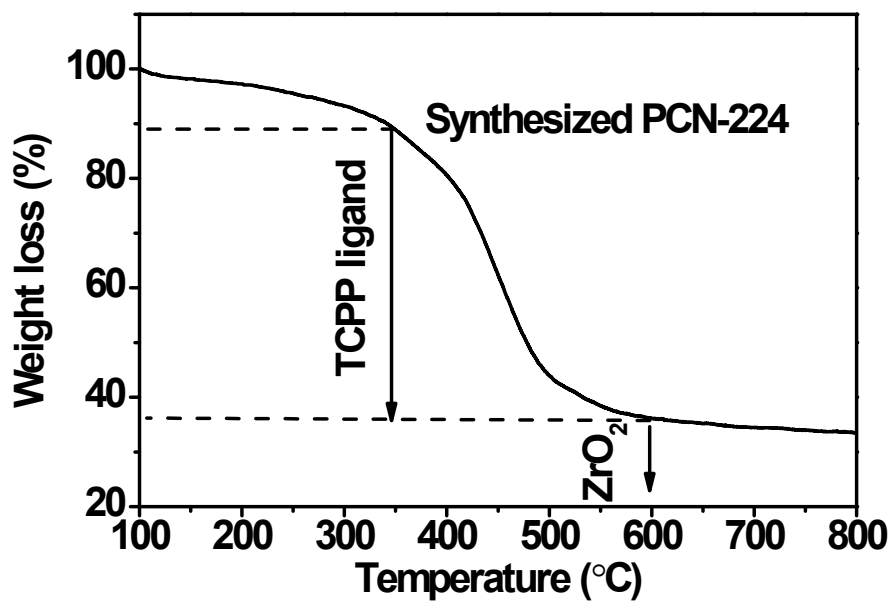

**Fig. S4** TGA profile for the as-synthesized PCN-224 particles recorded under air flow.

The calculation for the limit of detection (LOD)

$$\begin{aligned}\text{Detection Limit} &= 3\sigma/\text{slope} \\ &= (3 \times 0.17)/81.1 \times 1000 \\ &= 6 \text{ nM}\end{aligned}$$

Multiple number of PL spectra ( $n = 10$ ) were recorded for the blank sample of PCN-224 suspension. Sample standard deviation  $\sigma$  for the blank probe without the addition of  $\text{Hg}^{2+}$  was calculated to be 0.17.

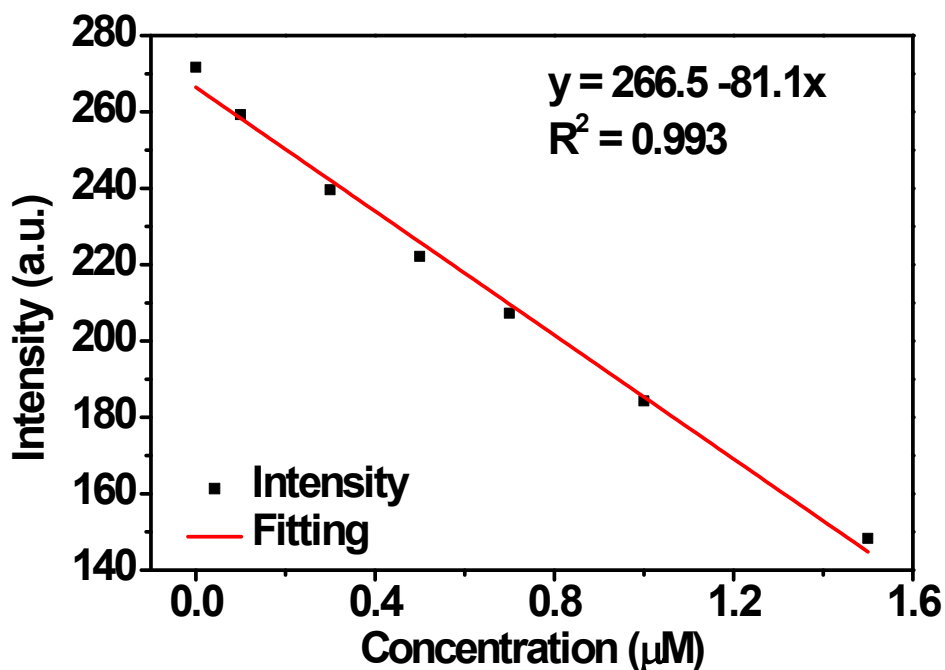

**Fig. S5** Relation of fluorescence intensity against  $\text{Hg}^{2+}$  added into PCN-224 suspension and their linear fitting curve for the estimation of LOD.

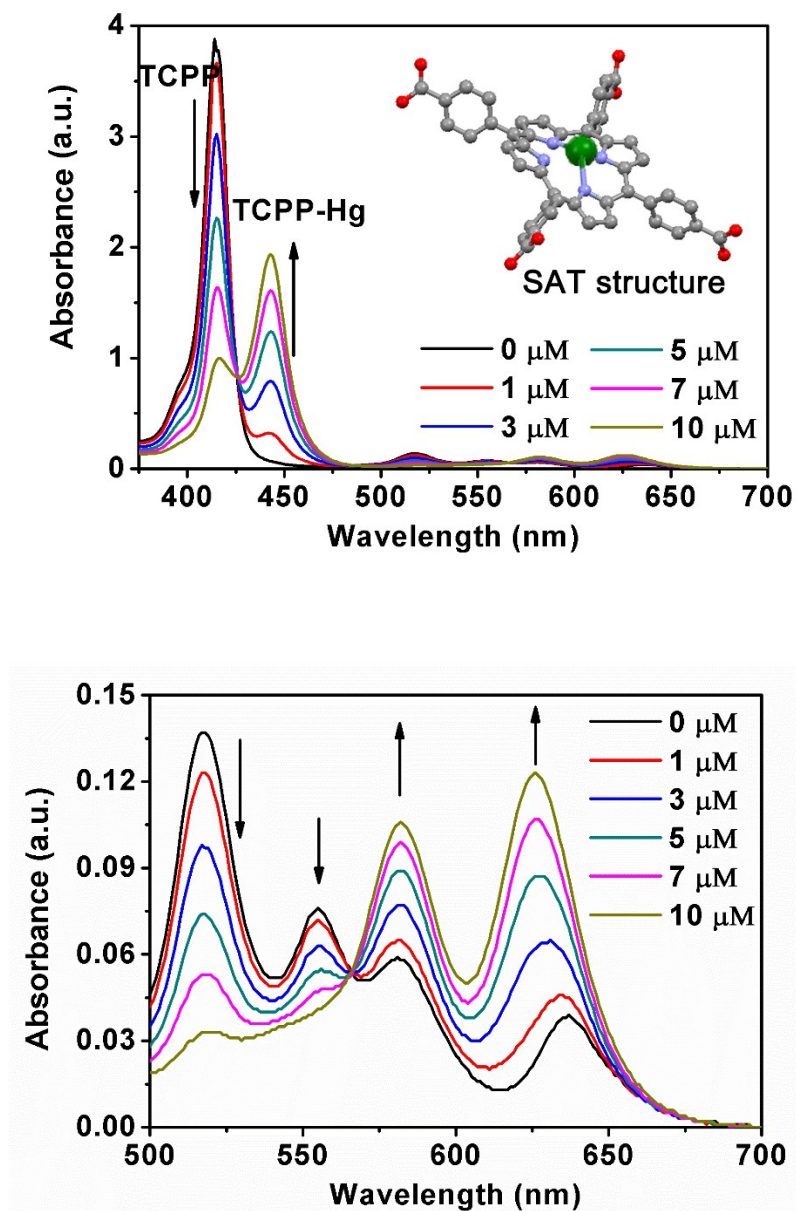

**Fig. S6** The evolvement of UV-Vis spectra of (A) the Soret band and (B) the enlargement of Q bands for free TCPP molecules ( $10 \text{ mg L}^{-1}$ ) in DMF/HEPES buffer solution ( $v/v = 1:1$ ,  $\text{pH} = 7$ ) upon the addition of various concentrations of  $\text{Hg}^{2+}$ . In the inset, schematic representations of the interaction mechanisms between the porphyrin molecule and  $\text{Hg}^{2+}$  ions in the PCN-224 probe, which is a “sitting-atop” (SAT) structure.

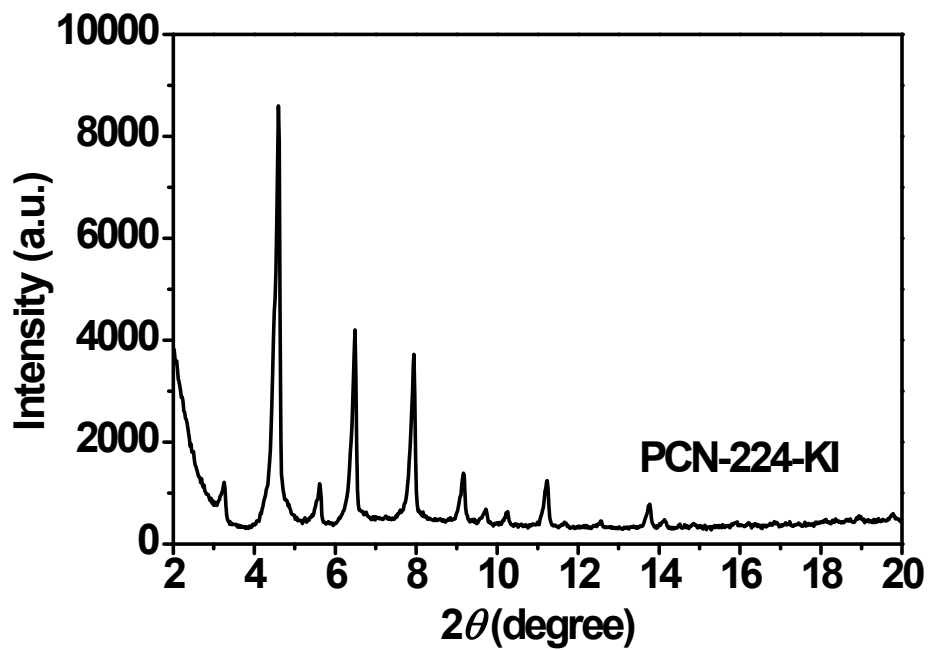

**Fig. S7** Powder XRD patterns of the PCN-224-KI particles regenerated by KI solution.

**Table S1.** The Comparison of Sensing Features between the Current PCN-224 Sensor and Other Reported Probes for the Detection of Hg<sup>2+</sup>.

| Probe                         | Material                                                                                                                                 | Detection range (μM) | LOD (nM) | Response Time | Regeneration                  | References       |
|-------------------------------|------------------------------------------------------------------------------------------------------------------------------------------|----------------------|----------|---------------|-------------------------------|------------------|
| MOF-based sensors             | {[Eu <sub>2</sub> (bqdc) <sub>3</sub> (H <sub>2</sub> O)(DMF) <sub>3</sub> ]·0.5 DMF·H <sub>2</sub> O} <sub>n</sub>                      | 10-1000              | 10       | 4 h           | —                             | 1                |
|                               | TbL <sub>1.5</sub> (H <sub>2</sub> O) <sub>2</sub> ]·H <sub>2</sub> O                                                                    | 1-1000               | —        | —             | EDTA                          | 2                |
|                               | Zr <sub>6</sub> O <sub>4</sub> (OH) <sub>4</sub> (BDC) <sub>6</sub>                                                                      | 0.001-0.5            | 52       | 10 s          | ClO <sub>4</sub> <sup>-</sup> | 3                |
|                               | {[Cd <sub>1.5</sub> (C <sub>18</sub> H <sub>10</sub> O <sub>10</sub> )]·(H <sub>3</sub> O)(H <sub>2</sub> O) <sub>3</sub> } <sub>n</sub> | 4-25                 | 2        | 15s           | —                             | 4                |
|                               | UiO-66-NH <sub>2</sub> @DNA                                                                                                              | 0.1-10               | 17.6     | —             | —                             | 5                |
|                               | COF-LZU8                                                                                                                                 | 0.33-33.3            | 125      | Real-time     | Na <sub>2</sub> S             | 6                |
| Other porphyrin-based sensors | H <sub>2</sub> TPP                                                                                                                       | 0.04-450             | 40       | 4 min         | 3-MPA                         | 7                |
|                               | TDMAPP                                                                                                                                   | 0.04-4               | 8        | —             | HCl                           | 8                |
|                               | naphthalimide-porphyrin                                                                                                                  | 0.1-50               | 20       | 2 min         | EDTA                          | 9                |
|                               | DTPP                                                                                                                                     | 0.5-310              | —        | 9 min         | HCl                           | 10               |
|                               | MTHNP                                                                                                                                    | 0.005-12.5           | 3        | 3 min         | buffer <sup>a</sup>           | 11               |
|                               | cationic porphyrin <sup>b</sup>                                                                                                          | 0.0001-1             | 0.1      | —             | —                             | 12               |
|                               | TPPS@SBA-15                                                                                                                              | 0.025-0.5            | 17.5     | 4 min         | —                             | 13               |
| <b>PCN-224 sensor</b>         | <b>Zr<sub>6</sub>O<sub>4</sub>(OH)<sub>4</sub>(TCPP)<sub>1.5</sub></b>                                                                   | <b>0.1-10</b>        | <b>6</b> | <b>2 min</b>  | <b>KI</b>                     | <b>This work</b> |

<sup>a</sup> the blank phosphate buffer of pH 7.5

<sup>b</sup>the cationic 5,15-(p-(9,9-bis(6-trimethylammoniumhexyl)fluorenylethynyl)phenyl)-porphyrin tetrabromide



## References

- 1 Y.-M. Zhu, C.-H. Zeng, T.-S. Chu, H.-M. Wang, Y.-Y. Yang, Y.-X. Tong, C.-Y. Su and W.-T. Wong, *J. Mater. Chem. A*, 2013, **1**, 11312–11319.
- 2 H.-M. Wang, Y.-Y. Yang, C.-H. Zeng, T.-S. Chu, Y.-M. Zhu and S. W. Ng, *Photochem. Photobiol. Sci.*, 2013, **12**, 1700–1706.
- 3 A. Shahat, H. M.A. Hassana and H. M.E. Azzazy, *Anal. Chim. Acta*, 2013, **793**, 90–98.
- 4 P. Wu, Y. Liu, Y. Liu, J. Wang, Y. Li, W. Liu and J. Wang, *Inorg. Chem.*, 2015, **54**, 11046–11048.
- 5 L.-L. Wu, Z. Wang, S.-N. Zhao, X. Meng, X.-Z. Song, J. Feng, S.-Y. Song and H.-J. Zhang, *Chem. Eur. J.*, 2016, **22**, 477 – 480.
- 6 S.-Y. Ding, M. Dong, Y.-W. Wang, Y.-T. Chen, H.-Z. Wang, C.-Y. Su and W. Wang, *J. Am. Chem. Soc.*, 2016, **138**, 3031–3037.
- 7 W. Chana, R. Yang and K. Wang, *Anal. Chim. Acta*, 2001, **444**, 261–269.
- 8 Y. Yang, J. Jiang, G. Shen and R. Yu, *Anal. Chim. Acta*, 2009, **636**, 83–88.
- 9 C.-Y. Li, X.-B. Zhang, L. Qiao, Y. Zhao, C.-M. He, S.-Y. Huan, L.-M. Lu, L.-X. Jian, G.-L. Shen and R.-Q. Yu, *Anal. Chem.*, 2009, **81**, 9993–10001.
- 10 X.-B. Zhang, C.-C. Guo, Z.-Z. Li, G.-L. Shen and R.-Q. Yu, *Anal. Chem.*, 2002, **74**, 821–825.
- 11 M. Shamsipura, M. Sadeghi, M. Beyzavi and H. Sharghi, *Mater. Sci. Eng. C*, 2015, **48**, 424–433.
- 12 Z. Fang and B. Liu, *Tetrahedron Lett.*, 2008, **49**, 2311–2315.
- 13 T. Balaji, M. Sasidharan and H. Matsunaga, *Analyst*, 2005, **130**, 1162–1167.
